# Supplementary material for: Synthesis and characterization of the cyclodiphosphazane embedded macrocycle tetrabromo-resorcin[4]arene-tetrakis(cyclodiphosphazane) and its tetra-rhodium(i) complex
Source: Royal Society of Chemistry journal article supplement (doi:10.1039/d3dt00880k), 2023-01-01
Supplement: d3dt00880k1.pdf [file d3dt00880k1.pdf]

## Electronic Supplementary Information

### Synthesis and characterization of cyclodiphosphazanes embedded macrocycle tetrabromo-resorcin[4]arene-tetrakis(cyclodiphosphazane) and its tetra-rhodium(I) complex

Madhusudan K. Pandey,<sup>a</sup> Sonu Sheokand,<sup>a</sup> and Maravanji S. Balakrishna<sup>a\*</sup>

<sup>a</sup>*Phosphorus Laboratory, Department of Chemistry, Indian Institute of Technology Bombay, Mumbai 400076, India*

---

|                                                               | Page no. |
|---------------------------------------------------------------|----------|
| Crystallographic information for <b>1</b> and <b>2</b>        | S2       |
| Experimental Section                                          | S3–S4    |
| Molecular structures of <b>1</b> and <b>2</b>                 | S5–S7    |
| NMR and HRMS spectral data of compounds <b>1</b> and <b>2</b> | S7–S14   |
| References                                                    | S14      |

---

Corresponding author E-mail: [krishna@chem.iitb.ac.in](mailto:krishna@chem.iitb.ac.in), [msb\\_krishna@iitb.ac.in](mailto:msb_krishna@iitb.ac.in)

**Table S1** Crystallographic information for compounds **1** and **2**.

|                                               | <b>1</b>                                                                                                                          | <b>2</b>                                                                                                                          |
|-----------------------------------------------|-----------------------------------------------------------------------------------------------------------------------------------|-----------------------------------------------------------------------------------------------------------------------------------|
| Empirical formula                             | C <sub>76</sub> H <sub>115</sub> Br <sub>4</sub> N <sub>8</sub> O <sub>8</sub> P <sub>8</sub> ·1(C <sub>6</sub> H <sub>14</sub> ) | C <sub>216</sub> H <sub>304</sub> Br <sub>8</sub> Cl <sub>8</sub> N <sub>16</sub> O <sub>16</sub> P <sub>16</sub> Rh <sub>8</sub> |
| Fw                                            | 1922.32                                                                                                                           | 5622.41                                                                                                                           |
| Cryst. System                                 | Triclinic                                                                                                                         | Orthorhombic                                                                                                                      |
| Space group                                   | P-1                                                                                                                               | Amm2                                                                                                                              |
| <i>a</i> , Å                                  | 12.7606(3)                                                                                                                        | 32.9022(9)                                                                                                                        |
| <i>b</i> , Å                                  | 19.6694(5)                                                                                                                        | 37.7479(10)                                                                                                                       |
| <i>c</i> , Å                                  | 19.8216(5)                                                                                                                        | 12.5306(4)                                                                                                                        |
| <i>α</i> , deg                                | 89.631(2)                                                                                                                         | 90                                                                                                                                |
| <i>β</i> , deg                                | 72.434(2)                                                                                                                         | 90                                                                                                                                |
| <i>γ</i> , deg                                | 83.770(2)                                                                                                                         | 90                                                                                                                                |
| <i>V</i> , Å <sup>3</sup>                     | 4713.3(2)                                                                                                                         | 15562.9(8)                                                                                                                        |
| <i>Z</i>                                      | 2                                                                                                                                 | 2                                                                                                                                 |
| <i>D</i> <sub>calc</sub> , g cm <sup>-3</sup> | 1.355                                                                                                                             | 1.200                                                                                                                             |
| <i>μ</i> (Mo Ka), mm <sup>-1</sup>            | 1.898                                                                                                                             | 1.637                                                                                                                             |
| <i>F</i> (000)                                | 2002.0                                                                                                                            | 5712.0                                                                                                                            |
| crystal size, mm                              | 0.271 × 0.091 × 0.072                                                                                                             | 0.254 × 0.165 × 0.092                                                                                                             |
| <i>T</i> (K)                                  | 100                                                                                                                               | 100                                                                                                                               |
| 2θ range, deg                                 | 4.168 to 49.998                                                                                                                   | 3.642 to 50                                                                                                                       |
| total no. Reflns                              | 49983                                                                                                                             | 87929                                                                                                                             |
| no. of indep reflns                           | 16572 [R <sub>int</sub> = 0.0819]                                                                                                 | 14156 [R <sub>int</sub> = 0.1771]                                                                                                 |
| <i>S</i>                                      | 1.033                                                                                                                             | 1.024                                                                                                                             |
| <i>R</i> <sub>I</sub>                         | 0.0582                                                                                                                            | 0.0719                                                                                                                            |
| <i>wR</i> <sub>2</sub>                        | 0.1445                                                                                                                            | 0.1877                                                                                                                            |

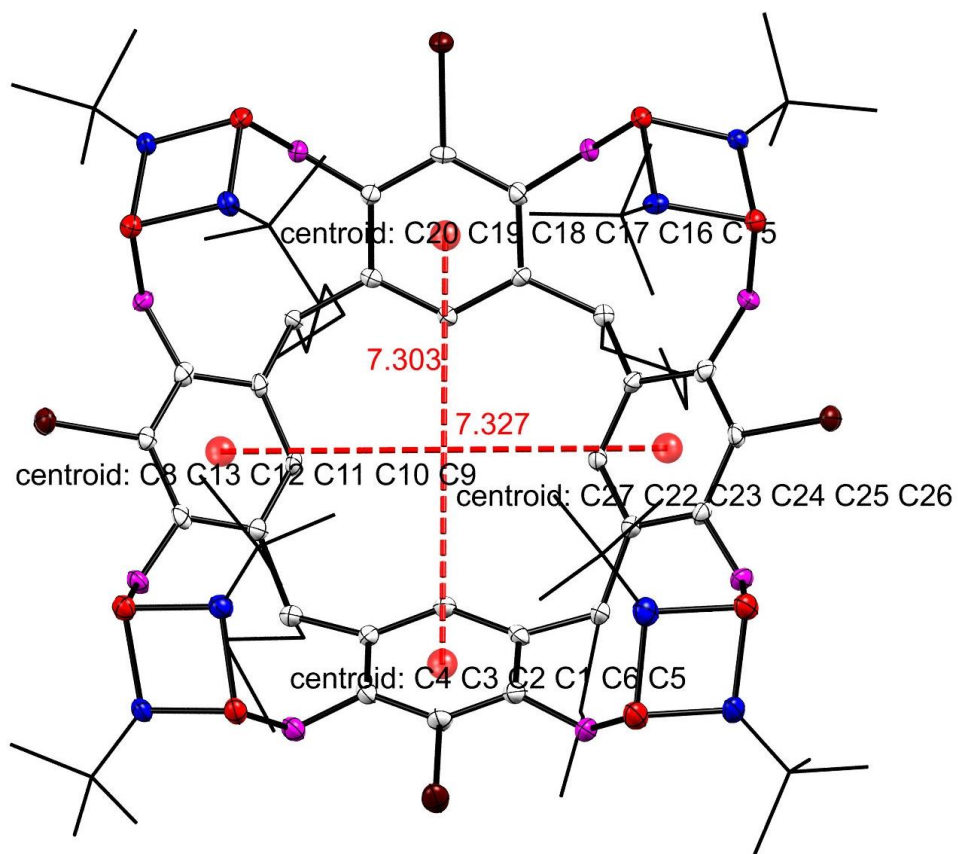

**Fig. S1** Molecular structure of **1**(top view). Distances between the centroids of the phenyl groups of resorcin[4]arene core showing  $C_{4v}$  crown conformation of **1**.

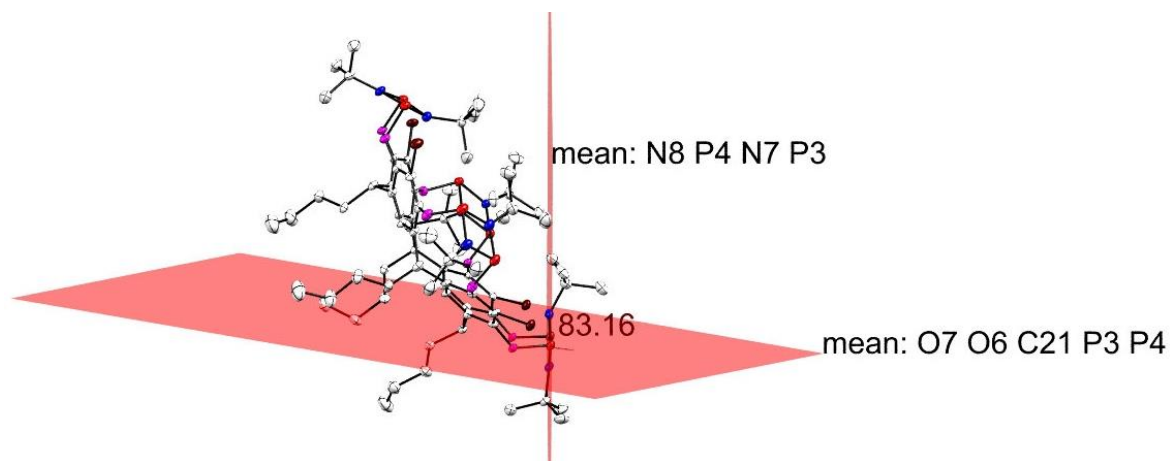

**Fig. S2** Molecular structure of **1** showing the angle between planes (O7O6C21P3P4) and (N8P4N7P3).

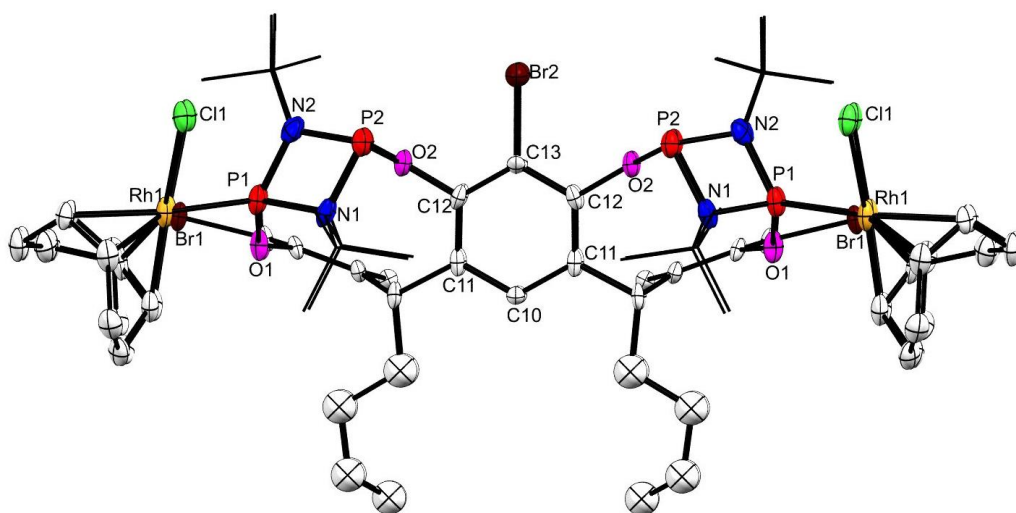

**Fig. S3** Molecular structure of **2**. Depicting the structural arrangements (front view).

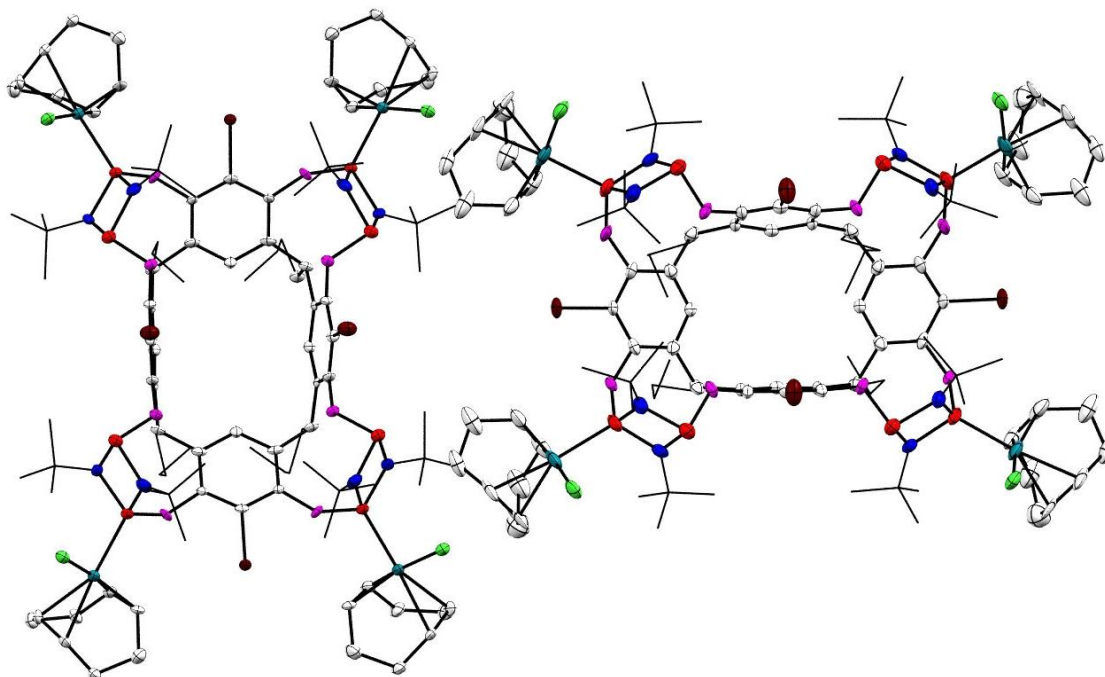

**Fig. S4** Molecular structure of **2**(top view). Selected bond lengths (Å) and bond angles (°): Rh1–P1 2.237(3), Rh1–Cl1 2.370(4), P1–O1 1.646(9), P1–N1 1.707(9), O1–P1–N1 108.0(5), P1–Rh1–Cl1 90.74(13), O1–P1–Rh1 111.4(3).

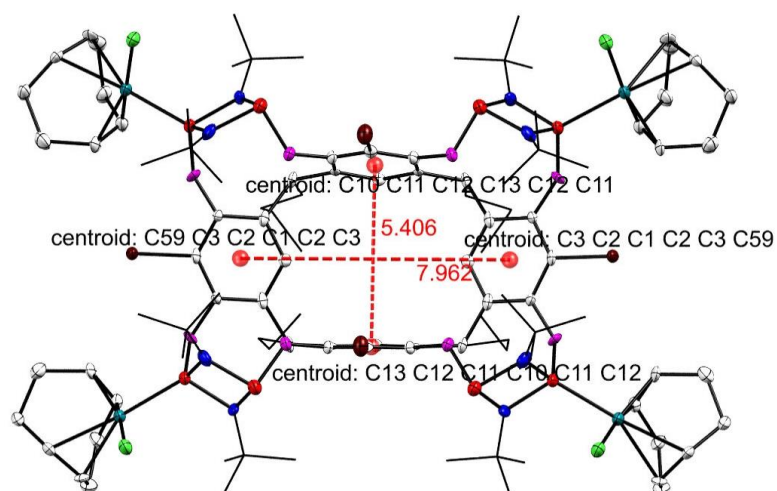

**Fig. S5** Molecular structure of **2** (top view). Distances between the centroids of the phenyl groups of resorcin[4]arene showing  $C_{2v}$  boat conformation of **2**.

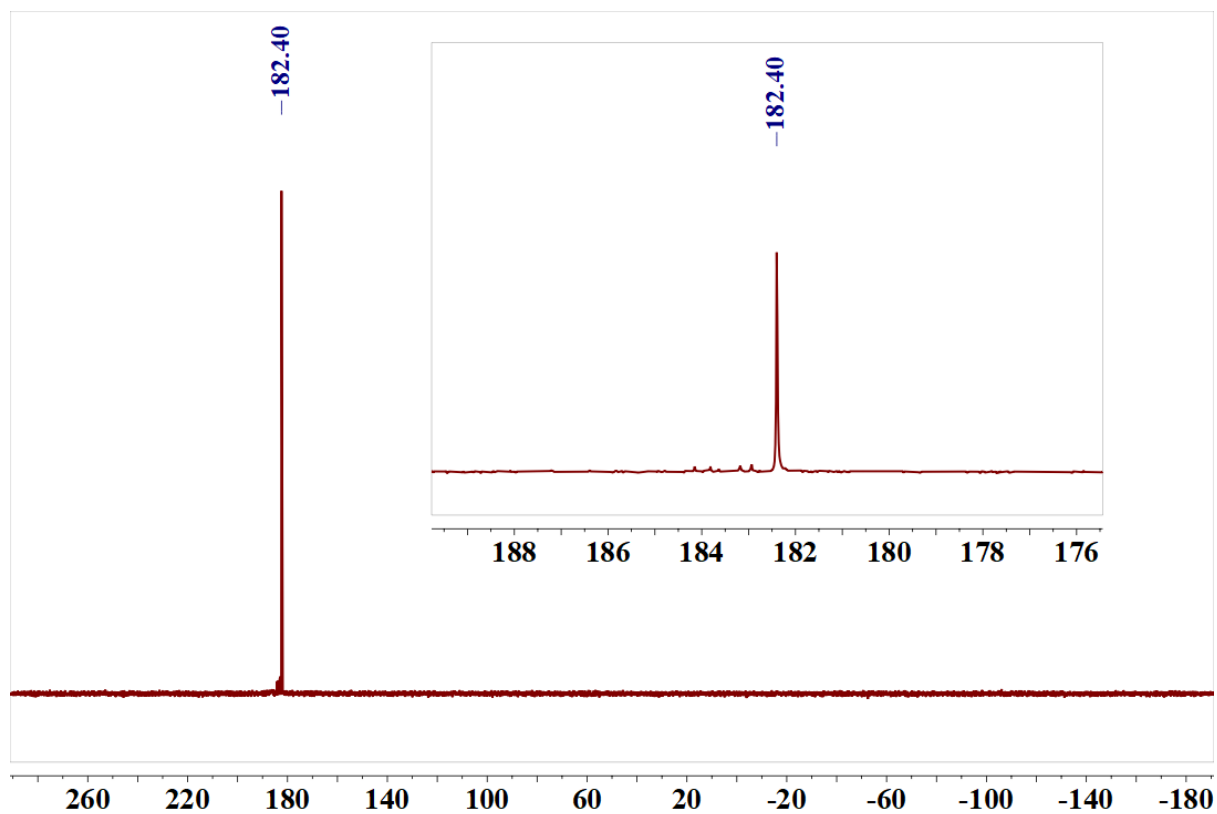

**Fig. S6**  $^{31}\text{P}\{^1\text{H}\}$  NMR spectrum of **1** in  $\text{CDCl}_3$  (162 MHz).

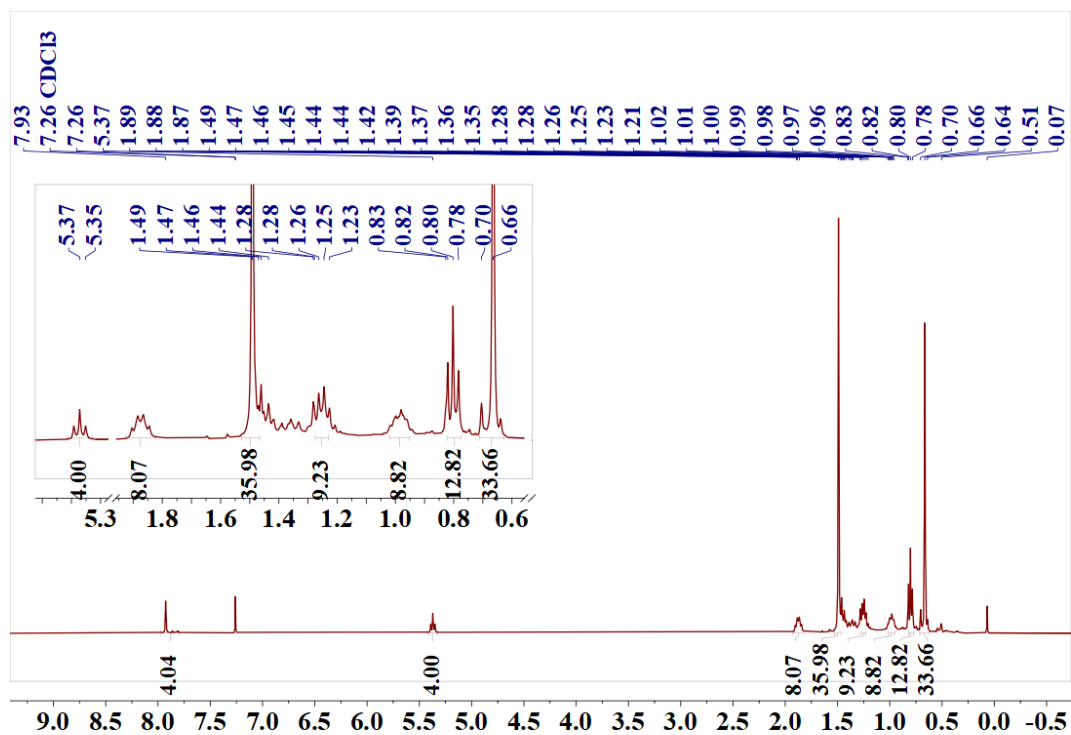

Fig. S7 <sup>1</sup>H NMR spectrum of **1** in CDCl<sub>3</sub> (400 MHz).

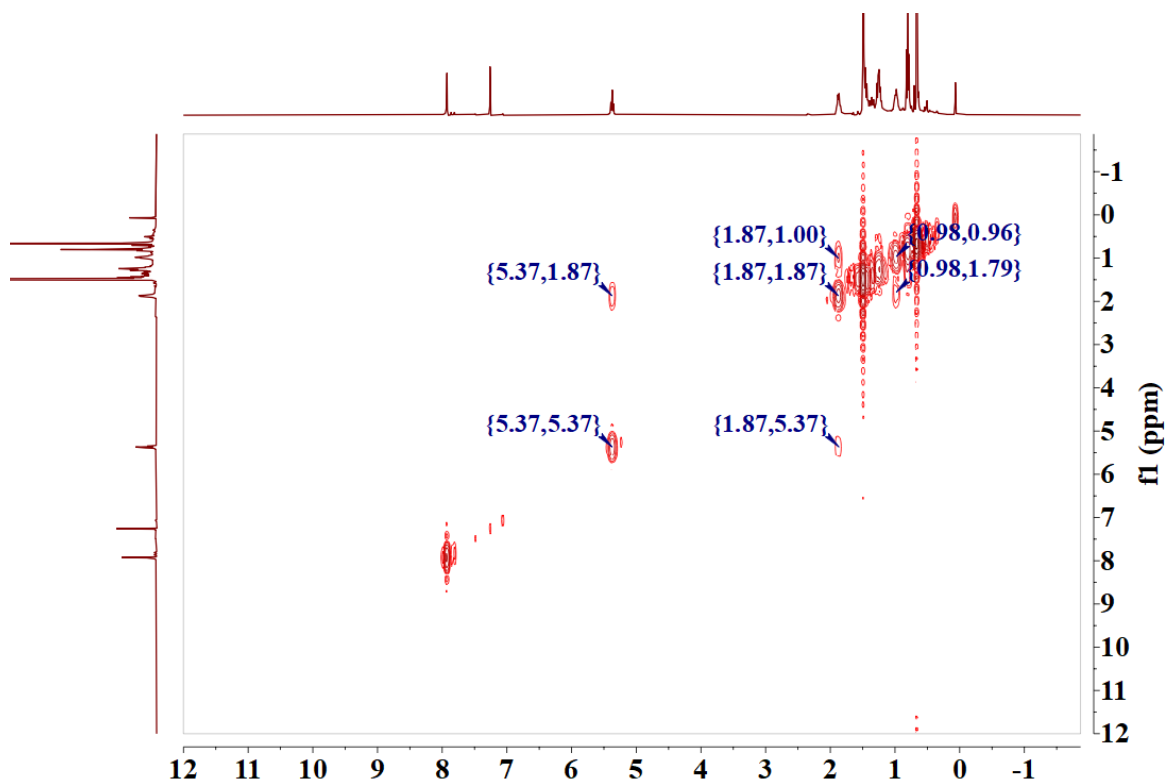

Fig. S8 <sup>1</sup>H-<sup>1</sup>H COSY NMR spectrum of **1** showing the correlation between 5.37, 1.87 ppm peaks and 1.87, 0.98 ppm peaks.

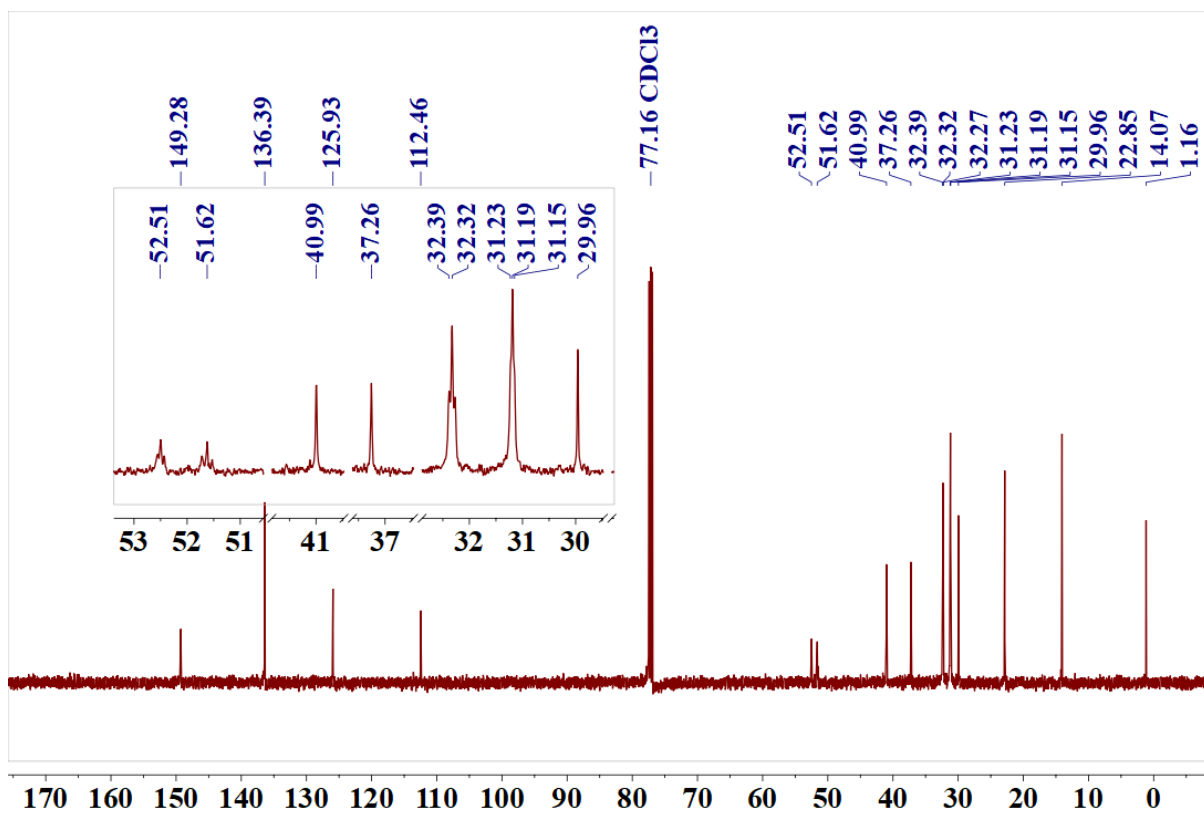

Fig. S9  $^{13}\text{C}\{^1\text{H}\}$  NMR spectrum of **1** in  $\text{CDCl}_3$  (126 MHz).

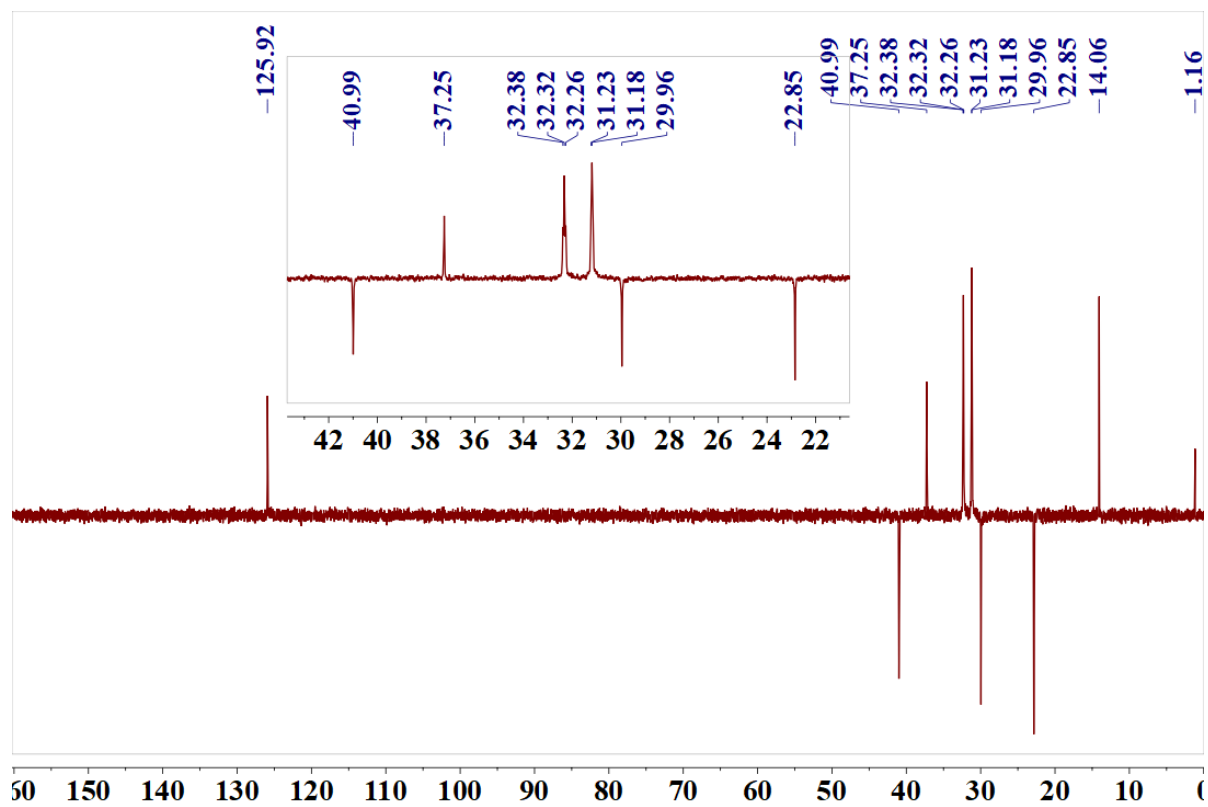

Fig. S10  $^{13}\text{C}$  DEPT-135 NMR spectrum of **1** in  $\text{CDCl}_3$ .

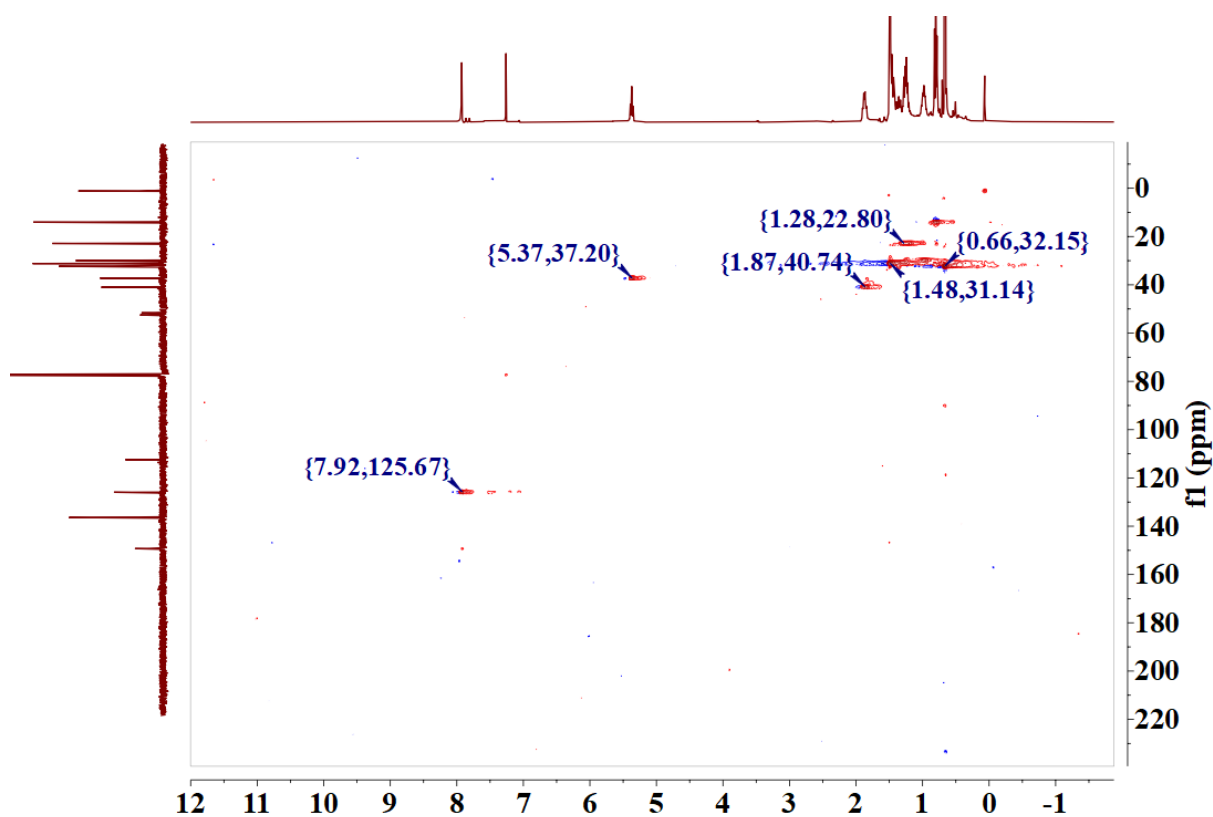

Fig. S11  $^1\text{H}$ - $^{13}\text{C}$  HSQC NMR spectrum of **1** in  $\text{CDCl}_3$ .

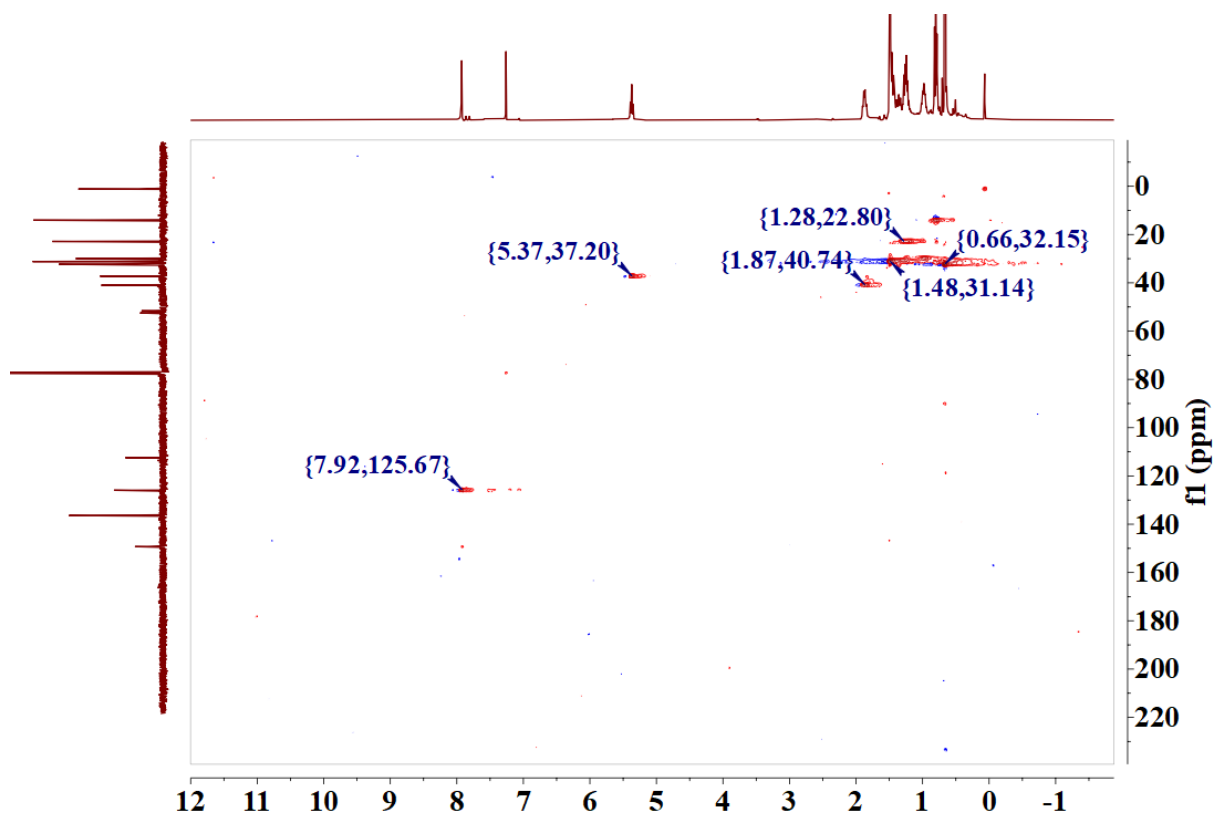

Fig. S12  $^1\text{H}$ - $^{13}\text{C}$  HSQC NMR spectrum of **1** in  $\text{CDCl}_3$  (Aliphatic region)



DEPARTMENT OF CHEMISTRY, I.I.T.(B)

**Analysis Info**

Analysis Name D:\Data\SEPT-2016\MSB-MKP-137-b.d  
 Method Tune\_pos\_NAICSI-3000a.m  
 Sample Name MSB-MKP-137-b  
 Comment C76H116O8N8P8Br4

Acquisition Date 9/3/2016 4:07:28 PM  
 Operator MSB IN  
 Instrument maXis impact 282001.00081

**Acquisition Parameter**

|             |          |                       |            |                  |           |
|-------------|----------|-----------------------|------------|------------------|-----------|
| Source Type | ESI      | Ion Polarity          | Positive   | Set Nebulizer    | 0.3 Bar   |
| Focus       | Active   | Set Capillary         | 3800 V     | Set Dry Heater   | 180 °C    |
| Scan Begin  | 50 m/z   | Set End Plate Offset  | -500 V     | Set Dry Gas      | 4.0 l/min |
| Scan End    | 3000 m/z | Set Collision Cell RF | 2100.0 Vpp | Set Divert Valve | Source    |

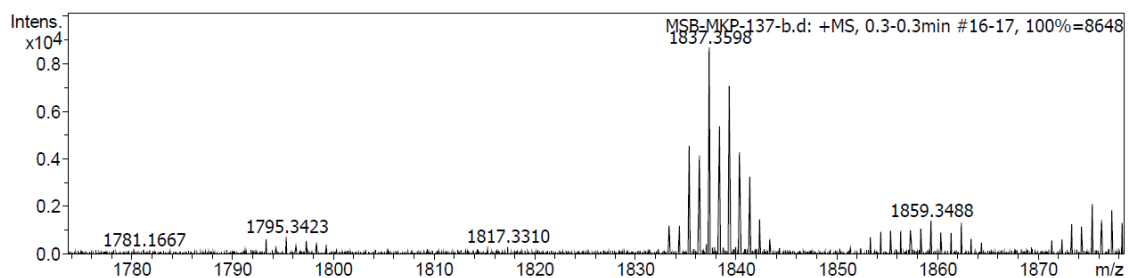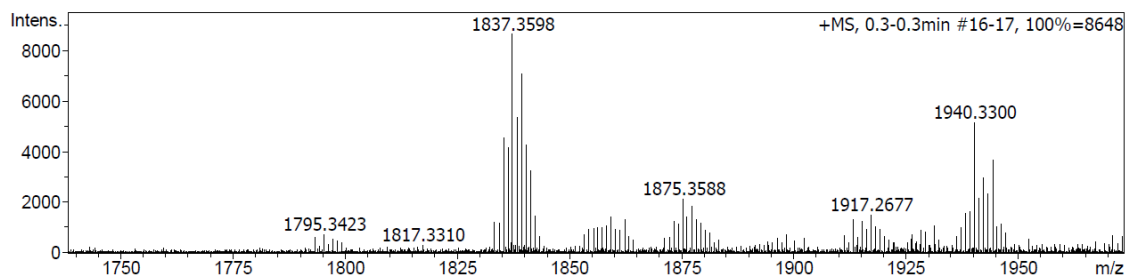

| Meas. m/z | # | Ion Formula      | m/z       | err [ppm] | mSigma | # Sigma | Score  | rdb  | e <sup>-</sup> Conf | N-Rule |
|-----------|---|------------------|-----------|-----------|--------|---------|--------|------|---------------------|--------|
| 1837.3598 | 1 | C76H117Br4N8O8P8 | 1833.3623 | -0.1      | 43.9   | 1       | 100.00 | 24.5 | even                | ok     |

**Fig. S13** HRMS spectrum of **1**.

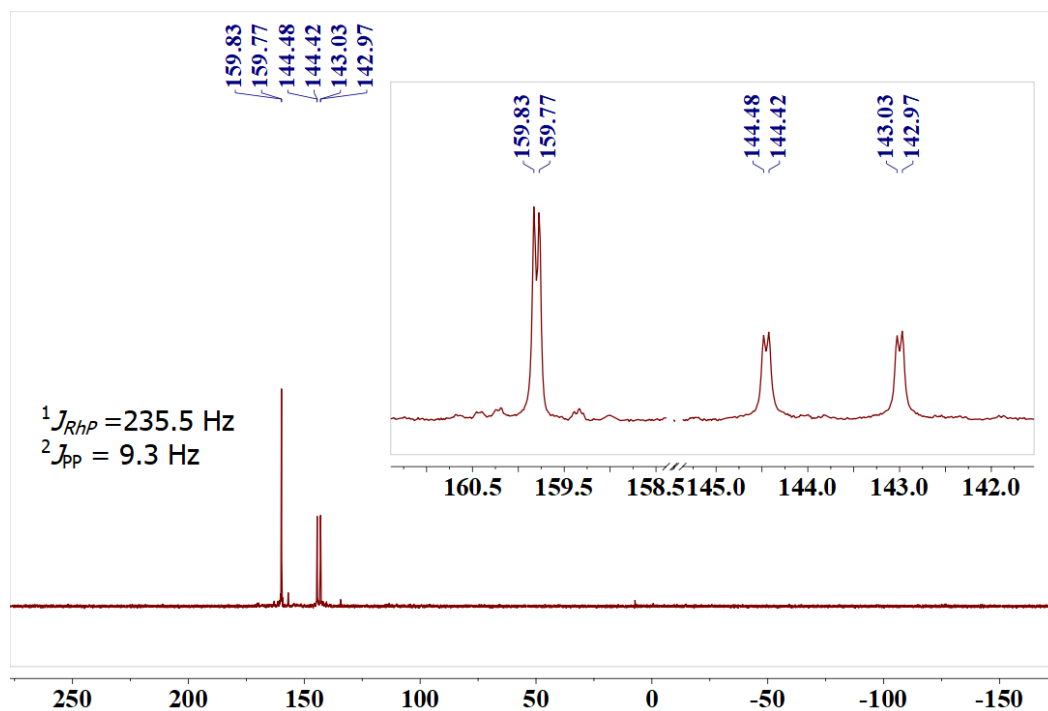

Fig. S14  $^{31}\text{P}\{^1\text{H}\}$  NMR spectrum of **2** in  $\text{CDCl}_3$  (162 MHz).

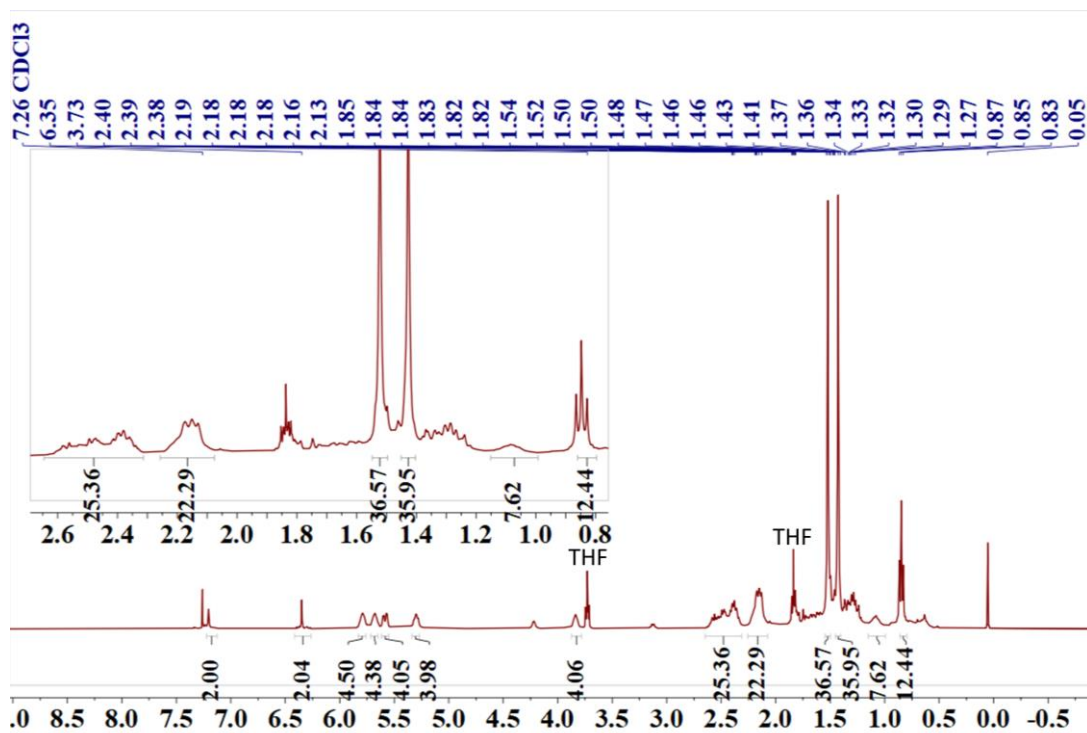

Fig. S15  $^1\text{H}$  NMR spectrum of **2** in  $\text{CDCl}_3$  (400 MHz).

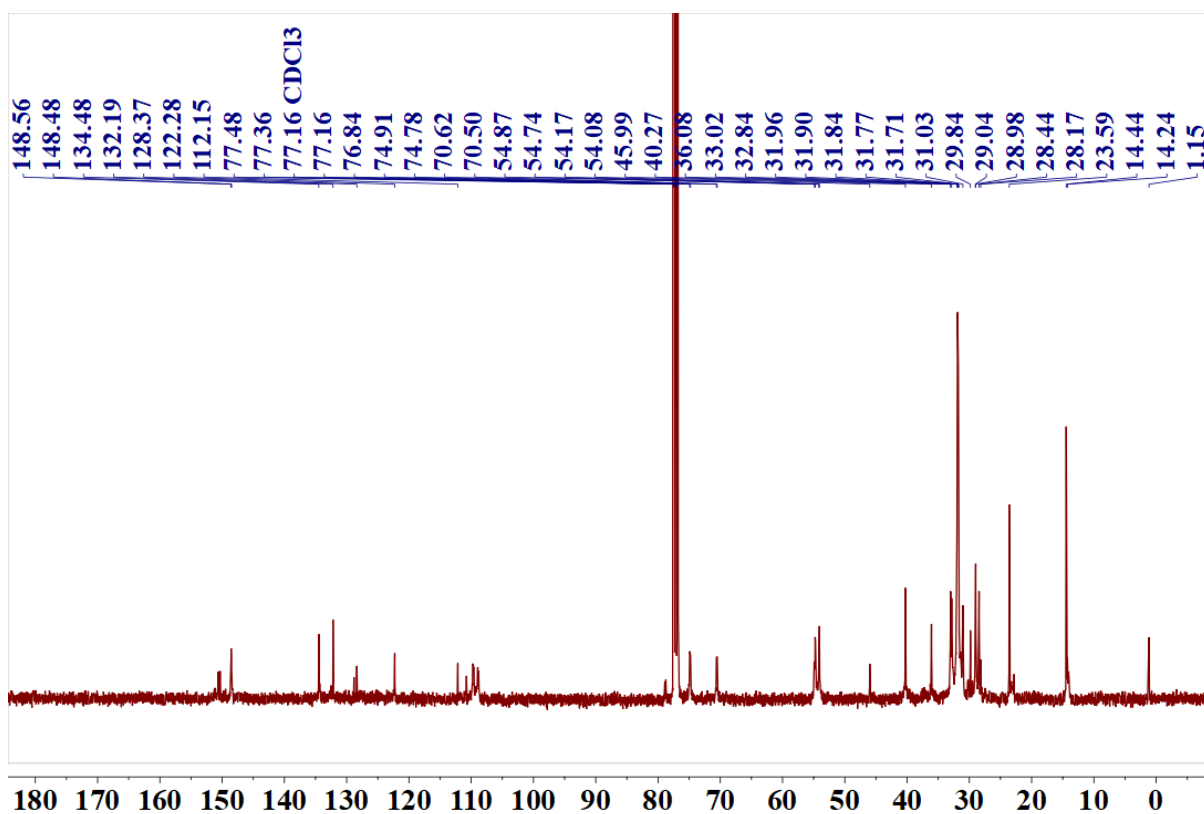

Fig. S16  $^{13}\text{C}\{^1\text{H}\}$  NMR spectrum of **2** in  $\text{CDCl}_3$  (101 MHz).

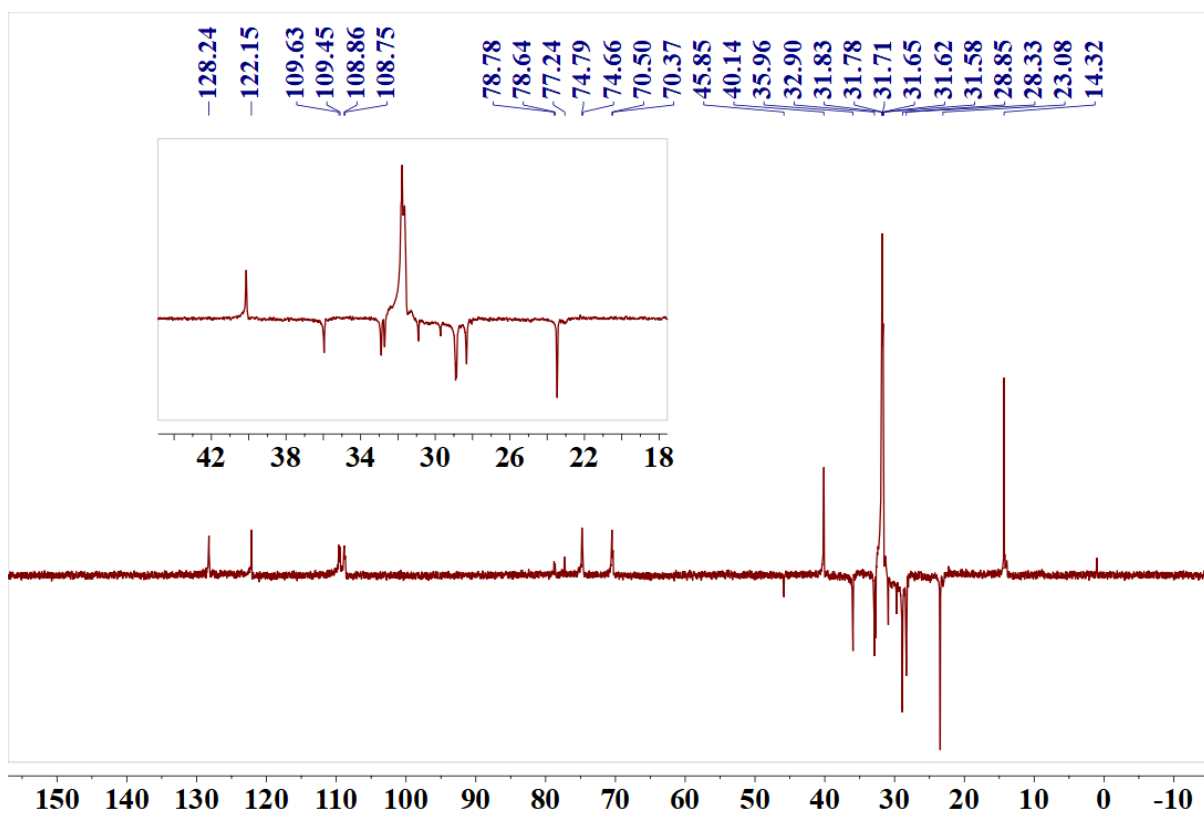

Fig. S17  $^{13}\text{C}$  DEPT-135 NMR spectrum of **2** in  $\text{CDCl}_3$ .

## DEPARTMENT OF CHEMISTRY, I.I.T.(B)

|               |                                  |                  |                           |  |
|---------------|----------------------------------|------------------|---------------------------|--|
| Analysis Info |                                  | Acquisition Date | 3/6/2023 2:51:53 PM       |  |
| Analysis Name | D:\Data\MAR-2023\msb-mkp-oct-2.d | Operator         | PG SRD OUT                |  |
| Method        | NaCl <sub>s</sub> _pos_3000.m    | Instrument       | maXis impact 282001.00081 |  |
| Sample Name   | msb-mkp-oct-2                    |                  |                           |  |
| Comment       | hms                              |                  |                           |  |

|                       |            |                      |          |                  |           |
|-----------------------|------------|----------------------|----------|------------------|-----------|
| Acquisition Parameter |            |                      |          |                  |           |
| Source Type           | ESI        | Ion Polarity         | Positive | Set Nebulizer    | 0.3 Bar   |
| Focus                 | Not active | Set Capillary        | 3700 V   | Set Dry Heater   | 180 °C    |
| Scan Begin            | 100 m/z    | Set End Plate Offset | -500 V   | Set Dry Gas      | 4.0 l/min |
| Scan End              | 3000 m/z   | Set Charging Voltage | 2000 V   | Set Divert Valve | Source    |
|                       |            | Set Corona           | 0 nA     | Set APCI Heater  | 0 °C      |

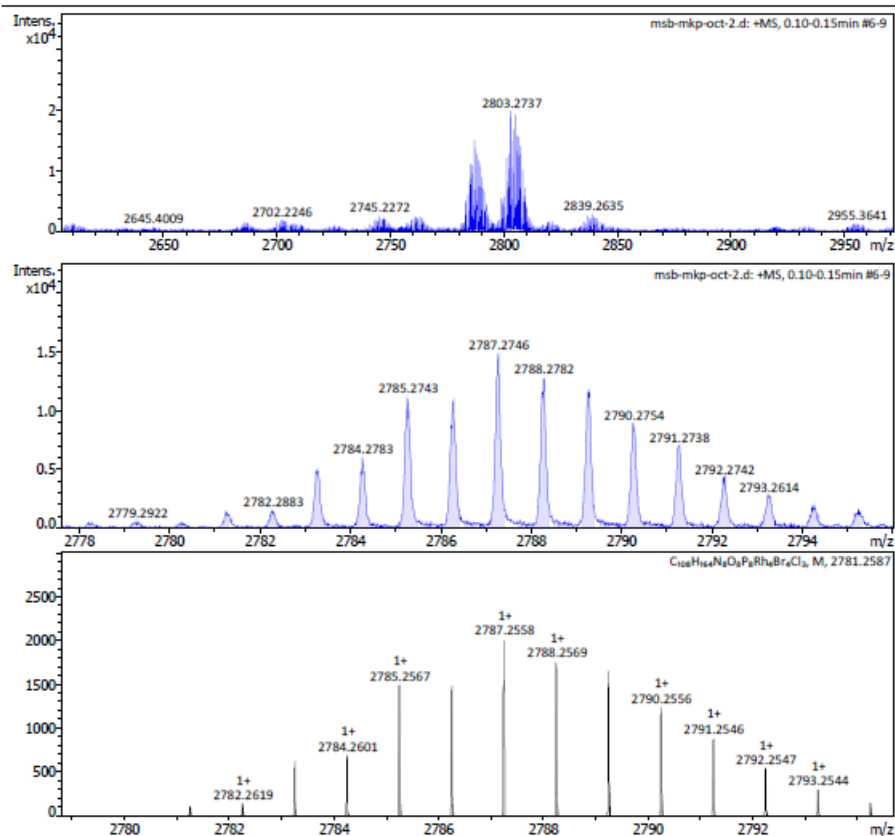

Fig. S18 HRMS spectrum of **2** showing  $[M-Cl]^+$  molecular ion peak at 2787.2746.

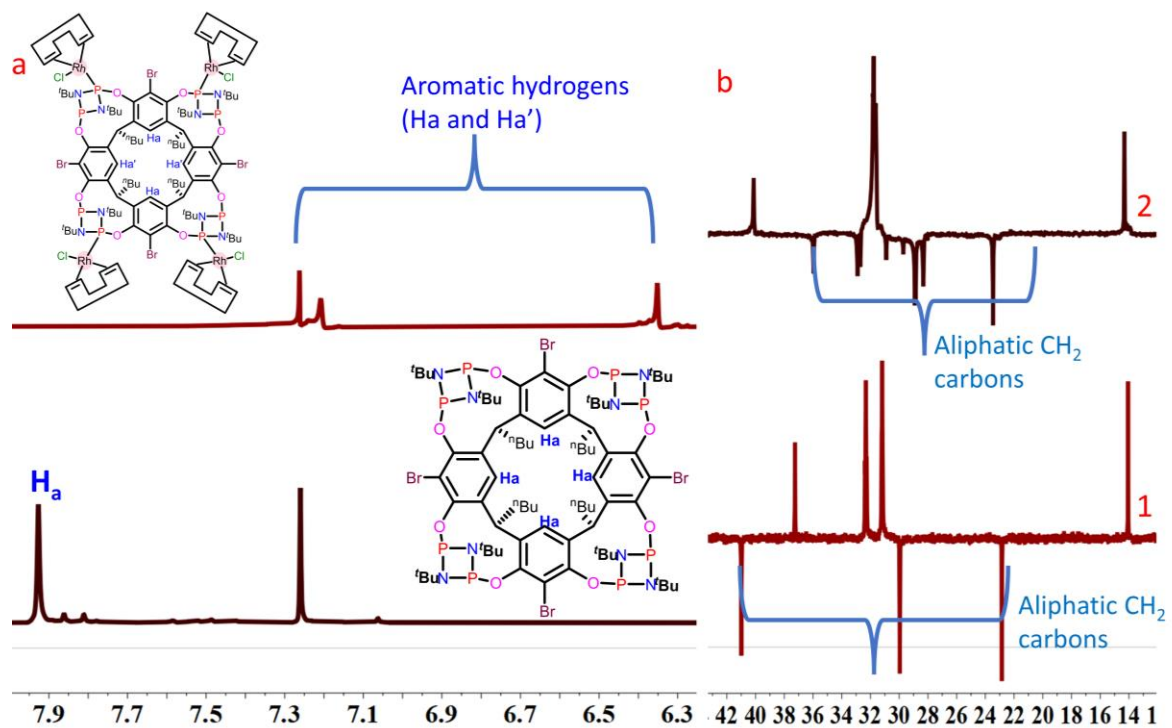

**Fig. S19** Stack plots of  $^1\text{H}$  (a: Left portion) and  $^{13}\text{C}$ -DEPT (b: Right portion) NMR spectra of **1** and **2** showing the changes after complex formation.
